# Supplementary material for: Metabolic Profiling of Heliotropium crispum Aerial Parts Using HPLC and FTIR and In Vivo Evaluation of Its Anti-Ulcer Activity Using an Ethanol Induced Acute Gastric Ulcer Model
Source: MDPI journal article supplement (doi:10.3390/metabo12080750), 2022-08-16

# **Metabolic Profiling of *Heliotropium crispum* Aerial Parts Using HPLC and FTIR and *In Vivo* Evaluation of its Anti-Ulcer Activity Using Ethanol Induced Acute Gastric Ulcer Model**

**Supplementary data**

**Figure S1:** FTIR spectrum of *Heliotropium crispum* aerial parts powder

**Figure S2:** HPLC chromatogram of the different extracts of *Heliotropium crispum* aerial parts

**Figure S1:** FTIR spectrum of *Heliotropium crispum* aerial parts powder

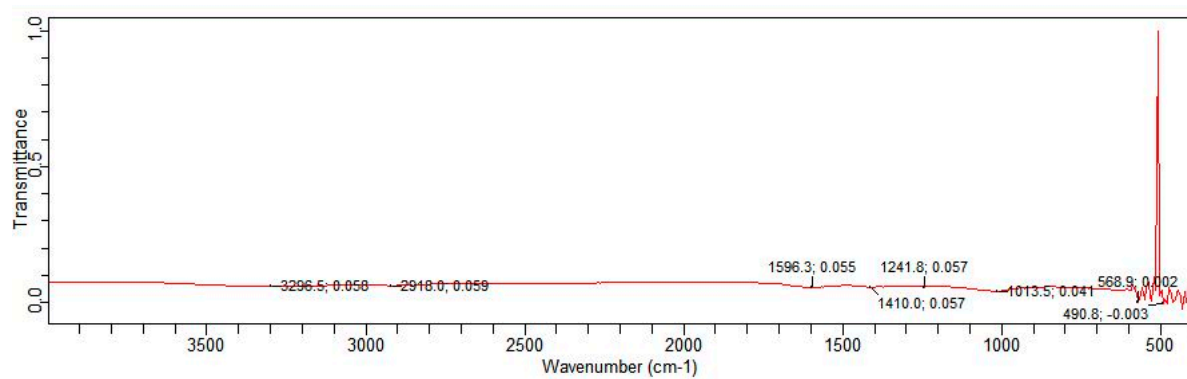

**Figure S2:** HPLC chromatograms of the different extracts of *Heliotropium crispum* aerial parts

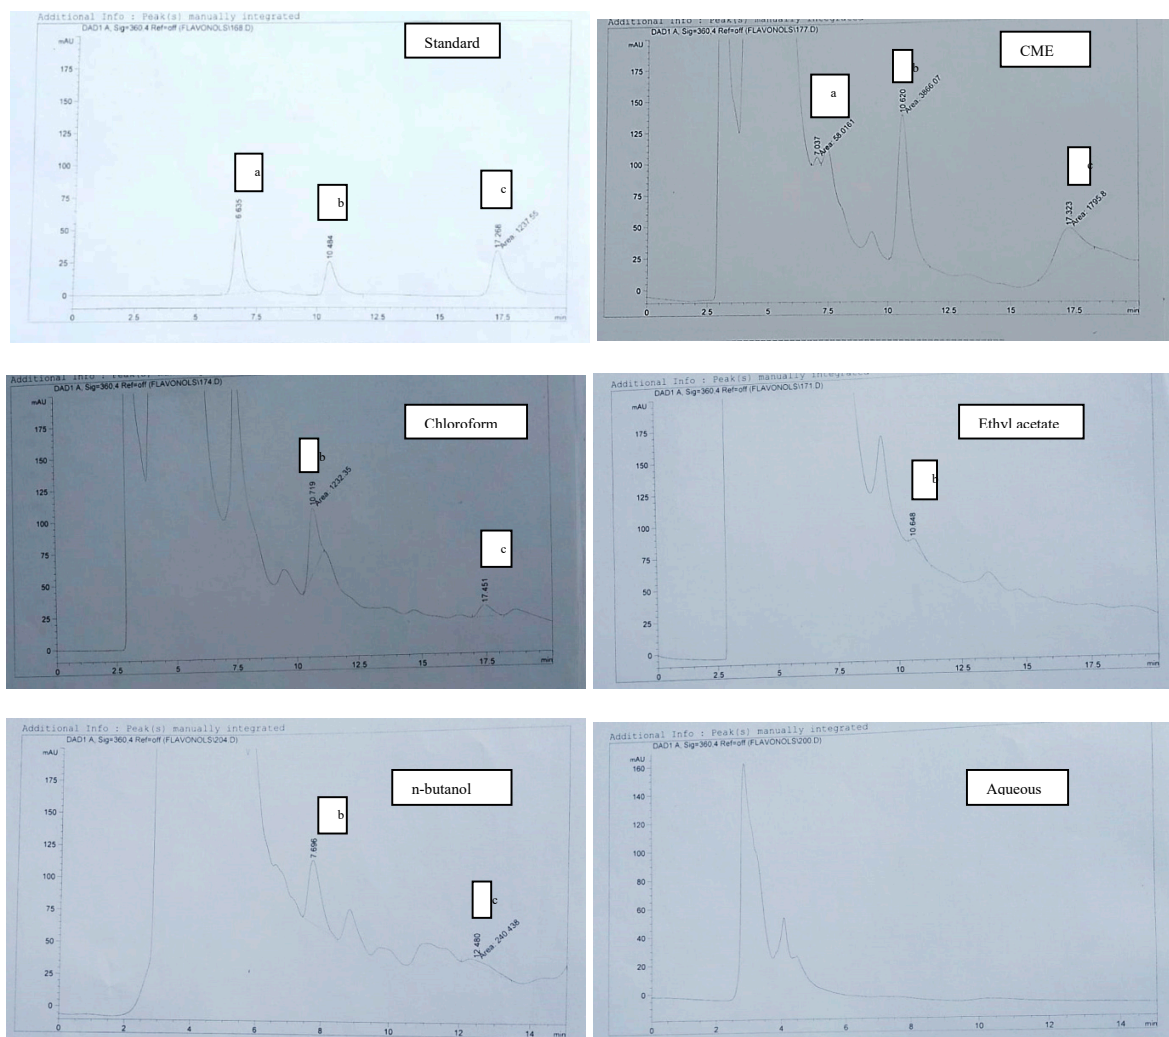

Supplement: s1 [file s1]
